# Supplementary material for: Lipophilic Grape Seed Proanthocyanidin Exerts Anti-Cervical Cancer Effects in HeLa Cells and a HeLa-Derived Xenograft Zebrafish Model
Source: MDPI journal article supplement (doi:10.3390/antiox11020422), 2022-02-19
Supplement: s1 [file s1]

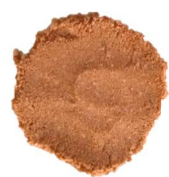

**GSP**

Lauric acid  
Lipozyme  
TL IM

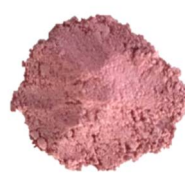

**LGSP**

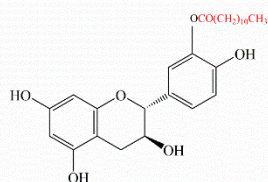

**3'-O-lauroylcatechin**

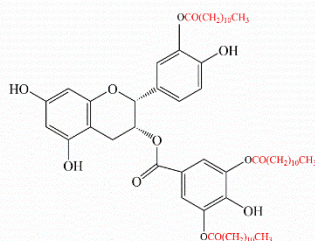

**3',3'',5''-3-O-lauroyl epicatechin gallate**

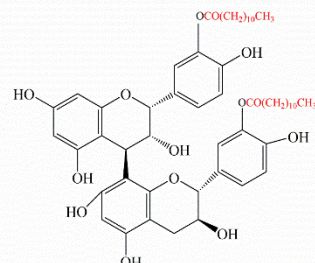

**3',3''-2-O-lauroyl procyanidin B1**

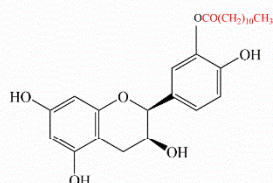

**3'-O-lauroyl epicatechin**

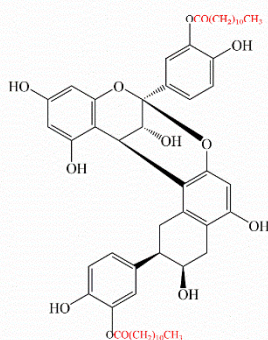

**3',3''-2-O-lauroyl procyanidin A2**

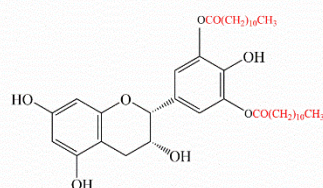

**3',5'-2-O-lauroyl epigallocatechin**

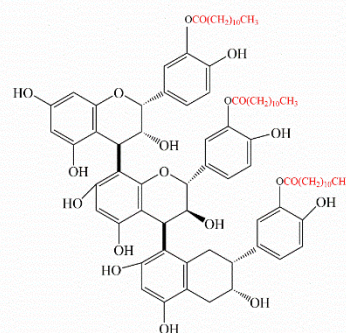

**3',3'',3'-3-O-lauroyl procyanidin C1**

**Figure S1. Synthesis of LGSP.**
